# Supplementary material for: Construction of Pará rubber tree genome and multi-transcriptome database accelerates rubber researches
Source: PubMed Central journal article supplement (PMC5780850; doi:10.1186/s12864-017-4333-y), 2018-01-19
Supplement: 12864_2017_4333_MOESM1_ESM.pdf [file 12864_2017_4333_MOESM1_ESM.pdf]

Table S1. Detailed information on the transcriptome data

| Category                       | Cultivar       | Sampling                                                            |             | Num of raw reads | After assembly |
|--------------------------------|----------------|---------------------------------------------------------------------|-------------|------------------|----------------|
| FL-cDNA (library construction) | RRIM 600       | latex, bark, leaf petiole                                           | Sanger seq  | 28,726           | 19,487 clones  |
|                                |                |                                                                     | Illumina    | 64,787,863       | 15,683 contigs |
| Iso-Seq                        | BPM24          | leaf                                                                | PacBio      | 205,310          | 45,968 seq     |
| EST                            | RRIM 600       | male and female flowers, fruits, bark, latex, vegetative shoot apex |             | 147,669          |                |
| RNA-seq                        | PB350          | latex                                                               | Replicate 1 | 50,140,881       |                |
|                                |                |                                                                     | Replicate 2 | 54,181,272       |                |
|                                | RRIM 901       | latex                                                               | Replicate 1 | 51,795,328       |                |
|                                |                |                                                                     | Replicate 2 | 50,904,032       |                |
|                                | RRIM 600       | latex                                                               | Replicate 1 | 46,991,131       |                |
|                                |                |                                                                     | Replicate 2 | 52,074,445       |                |
|                                | RRIM 600       | bark                                                                | Replicate 1 | 51,284,795       |                |
|                                |                |                                                                     | Replicate 2 | 46,559,165       |                |
|                                | RRIM 600       | petiole                                                             | Replicate 1 | 46,246,170       |                |
|                                |                |                                                                     | Replicate 2 | 43,268,532       |                |
|                                | RRIM 600       | leaf                                                                | Replicate 1 | 53,162,008       |                |
|                                |                |                                                                     | Replicate 2 | 47,181,675       | Accessions     |
|                                | RRIM 928       | latex                                                               | Replicate 1 | 25,192,286       | SRR854521      |
|                                |                |                                                                     | bark        | Replicate 1      | 84,943,813     |
| leaf                           |                |                                                                     |             | Replicate 1      | 24,789,161     |
| RRII105                        | latex control  | Replicate 1                                                         | 40,797,896  | SRR620237        |                |
|                                | latex stressed | Replicate 1                                                         | 47,060,495  | SRR620236        |                |

Highlighted samples are our original data. The others are public data.
